# Supplementary material
Source: MDPI journal article supplement (https://www.mdpi.com/2073-4441/15/15/2763)
Supplement: s1 [file s1]

## **Supplementary Materials**

# **Spatio-Temporal Dynamics of Non-Point Source Pollution in Jiulong River Basin (China) Using the Soil & Water Assessment Tool Model in Combination with the GeoSOS-FLUS Model**

**Zheng Li <sup>1</sup>, Wenchao Xue <sup>1,\*</sup>, Ekbordin Winijkul <sup>1</sup> and Sangam Shrestha <sup>2</sup>**

<sup>1</sup> Department of Energy, Environment and Climate Change, School of Environment, Resources and Development, Asian Institute of Technology, Klong Luang 12120, Thailand

<sup>2</sup> Department of Civil and Infrastructure Engineering, School of Engineering and Technology, Asian Institute of Technology, Klong Luang 12120, Thailand

Correspondence: wenchao@ait.ac.th; Tel.: +66-2524-5626

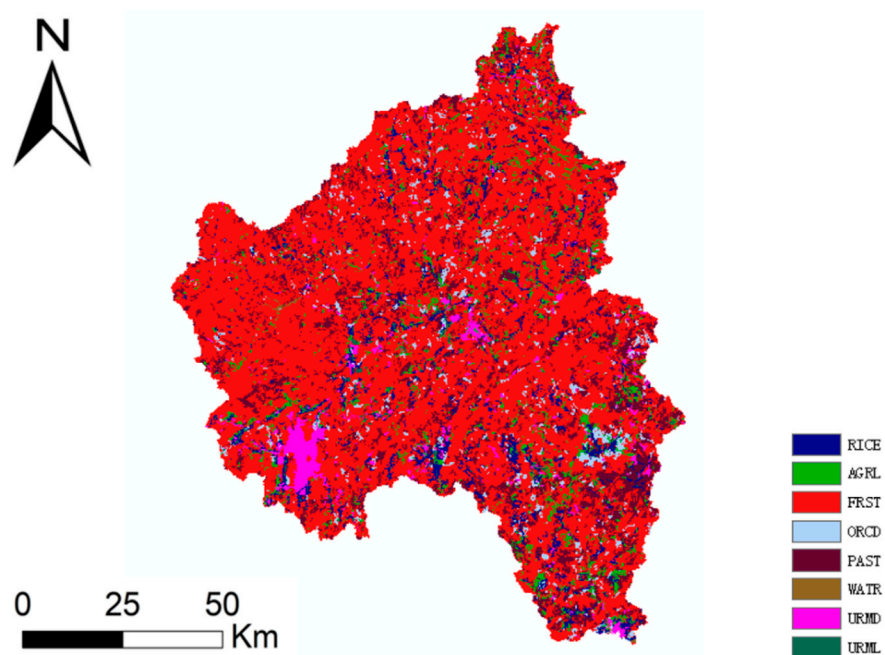

**Figure S1.** Land use map of Jiulong River (North Stream) basin

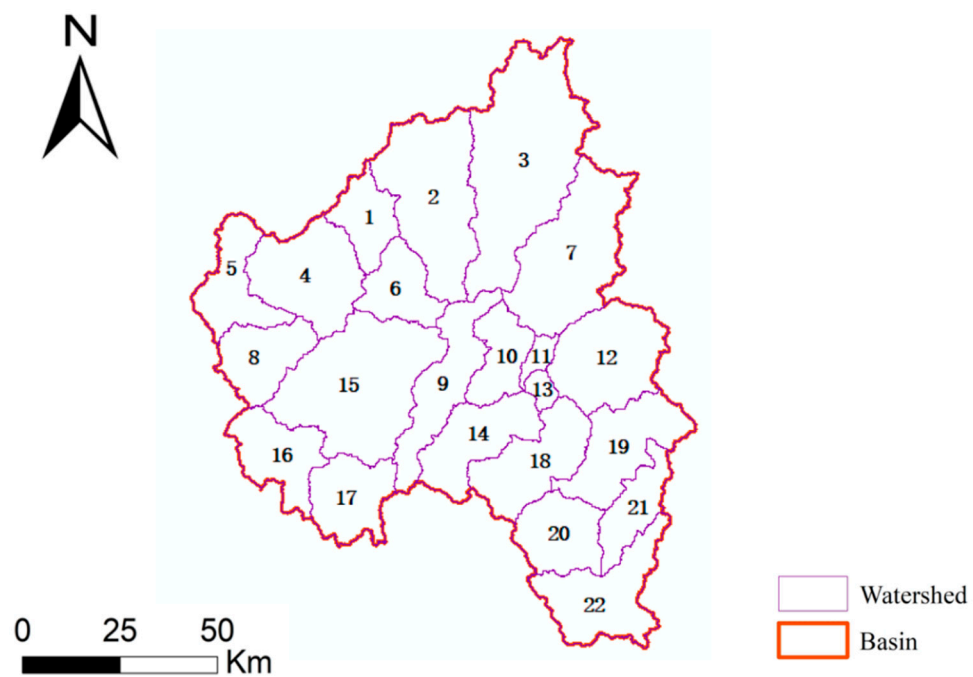

**Figure S2.** Sub-basin division map in study area

**Table S1.** The meanings and value results of parameters

| Parameter   | Range    | Definition                               | Value  |
|-------------|----------|------------------------------------------|--------|
| CN2.mgt     | 35-98    | Runoff curve coefficient                 | 84.78  |
| ALPHA_BF.gw | 0-1      | Baseflow subsidence coefficient          | 0.90   |
| GW_REVAP.gw | 0.02-0.2 | Groundwater reevaporation coefficient    | 0.05   |
| CH_N2.rte   | 0-1000   | Main channel Manning coefficient         | 0.04   |
| SOL_AWC.sol | -1—1     | Soil surface water content               | 0.11   |
| BIOMIX.mgt  | 0-1      | Biomixing efficiency                     | 0.04   |
| P_UPDIS.bsn | 0-100    | Phosphorus uptake Distribution parameter | 51.98  |
| PHOSKD.bsn  | 100-200  | Soil phosphorus partition coefficient    | 147.10 |
| NPERCO.bsn  | 0-1      | Nitrogen permeability coefficient        | 0.52   |
| PPERCO.bsn  | 10-17.5  | Phosphorus permeability coefficient      | 14.47  |

**Table S2.** Classification of nutrients loss intensity

| Level     | I         | II        | III       | IV         | V          |
|-----------|-----------|-----------|-----------|------------|------------|
| Ammonia-N | 0.00-0.10 | 0.10-0.50 | 0.50-1.00 | 1.00-10.00 | > 10.00    |
| TP        | < 0.00    | 0.00-0.50 | 0.50-1.00 | 1.00-2.00  | 2.00-10.00 |
